# Supplementary material for: Unsafe Drinking Water Is Associated with Environmental Enteric Dysfunction and Poor Growth Outcomes in Young Children in Rural Southwestern Uganda
Source: PubMed Central journal article supplement (PMC6283503; doi:10.4269/ajtmh.18-0143), 2018-10-22
Supplement: tpmd180143.SD1.pdf [file tpmd180143.SD1.pdf]

**Appendix Table A1: Relationship between municipality TB rate and the presence of correctional facilities**

| Variable                   | Specification 1 |          |         |          |          | Specification 2 |          |         |          |          | Specification 3 |          |         |          |          |
|----------------------------|-----------------|----------|---------|----------|----------|-----------------|----------|---------|----------|----------|-----------------|----------|---------|----------|----------|
|                            | Coef            | Std. Err | p-value | Lower CI | Upper CI | Coef            | Std. Err | p-value | Lower CI | Upper CI | Coef            | Std. Err | p-value | Lower CI | Upper CI |
| At least one corr. Facil   | 0.299           | 0.096    | 0.002   | 0.110    | 0.488    | 0.244           | 0.091    | 0.008   | 0.065    | 0.423    |                 |          |         |          |          |
| One corr. facility         |                 |          |         |          |          |                 |          |         |          |          | 0.241           | 0.092    | 0.009   | 0.062    | 0.421    |
| Two corr. facilities       |                 |          |         |          |          |                 |          |         |          |          | 0.422           | 0.173    | 0.015   | 0.082    | 0.762    |
| Three+ corr. facilities    |                 |          |         |          |          |                 |          |         |          |          | 0.627           | 0.148    | 0.000   | 0.337    | 0.916    |
| Demographic controls       |                 |          |         |          |          |                 |          |         |          |          |                 |          |         |          |          |
| Municipality population    | 0.000           | 0.000    | 0.083   | 0.000    | 0.000    | 0.000           | 0.000    | 0.000   | 0.000    | 0.000    | 0.000           | 0.000    | 0.016   | 0.000    | 0.000    |
| Population density         | 0.000           | 0.000    | 0.530   | 0.000    | 0.001    | 0.000           | 0.001    | 0.919   | -0.001   | 0.001    | 0.000           | 0.000    | 0.300   | 0.000    | 0.001    |
| % Black African residents  | -0.001          | 0.003    | 0.741   | -0.007   | 0.005    | -0.001          | 0.003    | 0.749   | -0.006   | 0.004    | 0.000           | 0.003    | 0.937   | -0.006   | 0.006    |
| Males per 100 females      | 0.001           | 0.009    | 0.888   | -0.017   | 0.019    | 0.002           | 0.008    | 0.769   | -0.013   | 0.018    | -0.002          | 0.008    | 0.804   | -0.019   | 0.014    |
| Socioeconomic controls     |                 |          |         |          |          |                 |          |         |          |          |                 |          |         |          |          |
| Unemployment rate          | -0.001          | 0.008    | 0.900   | -0.017   | 0.015    | -0.008          | 0.007    | 0.268   | -0.021   | 0.006    | -0.001          | 0.008    | 0.907   | -0.017   | 0.015    |
| No education               | 0.002           | 0.011    | 0.834   | -0.020   | 0.024    | 0.014           | 0.011    | 0.203   | -0.007   | 0.035    | 0.006           | 0.011    | 0.598   | -0.016   | 0.028    |
| Female headed household    | -0.006          | 0.005    | 0.221   | -0.016   | 0.004    | -0.009          | 0.005    | 0.053   | -0.018   | 0.000    | -0.010          | 0.005    | 0.050   | -0.020   | 0.000    |
| Formal dwelling            | -0.009          | 0.007    | 0.188   | -0.022   | 0.004    | -0.010          | 0.006    | 0.084   | -0.021   | 0.001    | -0.011          | 0.006    | 0.079   | -0.023   | 0.001    |
| Flush toilet               | 0.013           | 0.005    | 0.007   | 0.003    | 0.022    | 0.009           | 0.004    | 0.022   | 0.001    | 0.017    | 0.010           | 0.005    | 0.029   | 0.001    | 0.020    |
| Garbage removal            | -0.002          | 0.006    | 0.721   | -0.013   | 0.009    | -0.002          | 0.005    | 0.629   | -0.012   | 0.007    | 0.001           | 0.005    | 0.896   | -0.010   | 0.011    |
| Piped water                | -0.003          | 0.006    | 0.605   | -0.015   | 0.009    | -0.004          | 0.006    | 0.464   | -0.015   | 0.007    | -0.003          | 0.006    | 0.651   | -0.015   | 0.009    |
| Electricity                | -0.004          | 0.008    | 0.605   | -0.020   | 0.012    | 0.005           | 0.007    | 0.516   | -0.009   | 0.019    | -0.003          | 0.008    | 0.716   | -0.019   | 0.013    |
| Health system controls     |                 |          |         |          |          |                 |          |         |          |          |                 |          |         |          |          |
| Under 5 mortality          | 0.028           | 0.043    | 0.507   | -0.055   | 0.112    | 0.051           | 0.040    | 0.197   | -0.027   | 0.128    | 0.036           | 0.042    | 0.393   | -0.047   | 0.118    |
| Immunization rate          | -0.012          | 0.007    | 0.103   | -0.026   | 0.002    | -0.010          | 0.007    | 0.112   | -0.023   | 0.002    | -0.013          | 0.007    | 0.085   | -0.028   | 0.002    |
| MMR immunization rate      | -0.001          | 0.001    | 0.386   | -0.003   | 0.001    | -0.002          | 0.001    | 0.030   | -0.004   | 0.000    | -0.001          | 0.001    | 0.633   | -0.003   | 0.002    |
| Condom distribution rate   | -0.006          | 0.008    | 0.401   | -0.022   | 0.009    | 0.000           | 0.007    | 0.964   | -0.013   | 0.013    | -0.006          | 0.008    | 0.448   | -0.021   | 0.009    |
| Smear conversion rate      | 0.017           | 0.013    | 0.180   | -0.008   | 0.042    | 0.008           | 0.012    | 0.469   | -0.014   | 0.031    | 0.015           | 0.013    | 0.236   | -0.010   | 0.040    |
| TB cure rate               | 0.015           | 0.012    | 0.195   | -0.008   | 0.038    | 0.004           | 0.010    | 0.693   | -0.016   | 0.024    | 0.010           | 0.012    | 0.386   | -0.013   | 0.033    |
| TB default rate            | 0.019           | 0.038    | 0.618   | -0.056   | 0.094    | -0.025          | 0.038    | 0.503   | -0.099   | 0.049    | -0.005          | 0.039    | 0.902   | -0.082   | 0.072    |
| HIV testing rate           | 0.009           | 0.017    | 0.576   | -0.024   | 0.043    | 0.046           | 0.018    | 0.011   | 0.010    | 0.081    | 0.020           | 0.018    | 0.281   | -0.016   | 0.056    |
| Antenatal HIV+ test rate   | -0.029          | 0.013    | 0.024   | -0.054   | -0.004   | -0.017          | 0.011    | 0.117   | -0.039   | 0.004    | -0.029          | 0.014    | 0.030   | -0.056   | -0.003   |
| Antenatal ART take-up      | 0.001           | 0.005    | 0.905   | -0.008   | 0.009    | -0.001          | 0.004    | 0.763   | -0.010   | 0.007    | 0.001           | 0.005    | 0.818   | -0.008   | 0.010    |
| Govt. hlth. exp. uninsured | 0.000           | 0.000    | 0.046   | 0.000    | 0.001    | 0.000           | 0.000    | 0.006   | 0.000    | 0.001    | 0.001           | 0.000    | 0.010   | 0.000    | 0.001    |
| Spending on primary care   | 0.001           | 0.007    | 0.833   | -0.011   | 0.014    | 0.006           | 0.006    | 0.289   | -0.005   | 0.018    | 0.001           | 0.006    | 0.848   | -0.011   | 0.013    |
| Total number of tests      |                 |          |         |          |          | 0.000           | 0.000    | 0.000   | 0.000    | 0.000    |                 |          |         |          |          |
| Constant                   | -6.542          | 2.270    | 0.004   | -10.992  | -2.092   | -9.398          | 2.373    | 0.000   | -14.049  | -4.748   | -6.638          | 2.262    | 0.003   | -11.071  | -2.204   |
